# Supplementary material
Source: Springer Nature journal article supplement (https://www.springermedizin.de/resource/supplementary/12933_2008_133_MOESM2_ESM.pdf/9539668)

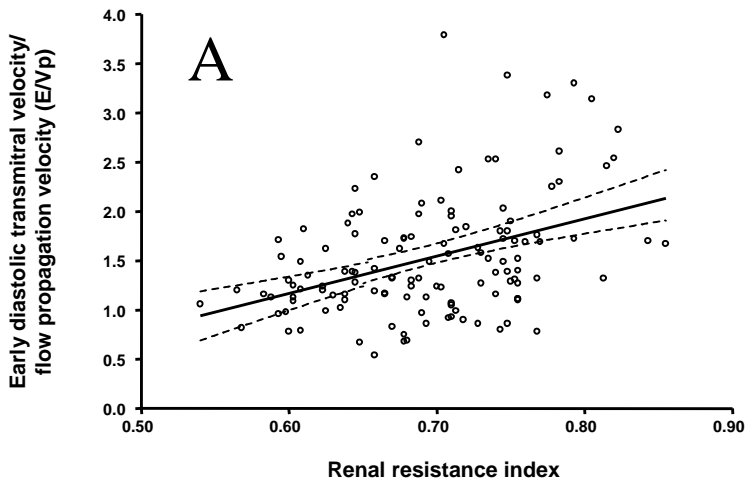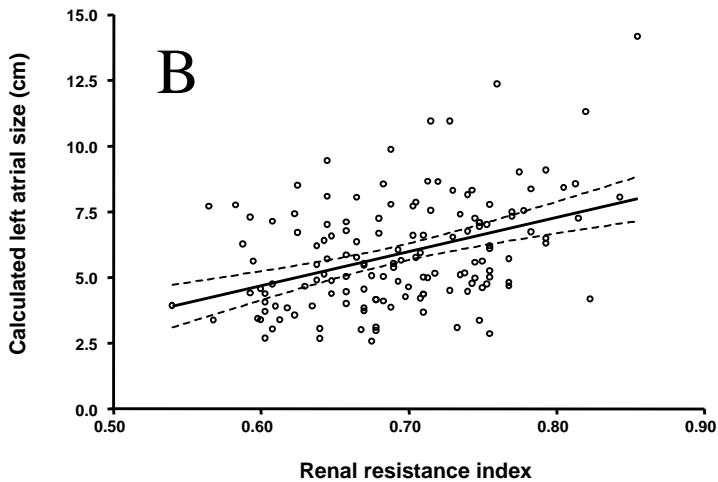

Supplement: MOESM2 [file 9539668]
